# Supplementary material
Source: publisher site journal article supplement (https://kjim.org/upload/media/kjim-2023-491-Supplementary-Fig-1.pdf)
Supplement: Supplementary file 1 [file kjim-2023-491-Supplementary-Fig-1.pdf]

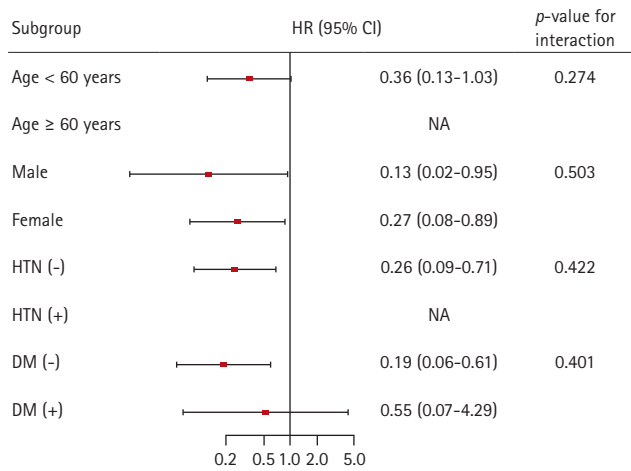

**Supplementary Figure 1.** Multivariable Cox regression analysis for incident CKD according to obesity reduction, stratified by subgroups. Models were adjusted for age, sex, HTN, DM, alcohol consumption, smoking, LDL cholesterol, hemoglobin, CRP, and baseline eGFR. HR, hazard ratio; CI, confidence interval; HTN, hypertension; DM, diabetes mellitus; CKD, chronic kidney disease; LDL, low-density lipoprotein; CRP, C-reactive protein; eGFR, estimated glomerular filtration rate.
